# Supplementary material for: Association of CYP24A1 Gene rs6127099 (A > T) Polymorphism with Lower Risk to COVID-19 Infection in Kazakhstan
Source: MDPI journal article supplement (doi:10.3390/genes14020307), 2023-01-24
Supplement: s1 [file s1]

**Table S1.** Association of candidate SNPs with symptomless COVID-19. Genotype frequencies and inheritance patterns of selected SNPs stratified by gender and age categories.

| Model                  | SNP [Gene]              | Total        |                  |           | Gender-based stratification |           |                    |           | Age-based stratification |           |                  |           |                   |           |
|------------------------|-------------------------|--------------|------------------|-----------|-----------------------------|-----------|--------------------|-----------|--------------------------|-----------|------------------|-----------|-------------------|-----------|
|                        |                         | Case/Control | OR (95% CI)      | p-value   | Male                        |           | Female             |           | <40                      |           | 40-60            |           | 60+               |           |
|                        |                         |              |                  |           | OR (95% CI)                 | p-value   | OR (95% CI)        | p-value   | OR (95% CI)              | p-value   | OR (95% CI)      | p-value   | OR (95% CI)       | p-value   |
| rs731236<br>TaqI [VDR] |                         |              |                  |           |                             |           |                    |           |                          |           |                  |           |                   |           |
| Additive               | AA                      | 74/34        | Reference        |           | Reference                   |           | Reference          |           | Reference                |           | Reference        |           | Reference         |           |
|                        | AG                      | 50/12        | 1.91 (0.9–4.05)  | 0.089     | 1.8 (0.7 - 4.61)            | 0.221     | 1.92 (0.54 - 6.86) | 0.309     | 3.03 (0.81-11.31)        | 0.098     | 1.28 (0.38-4.27) | 0.691     | 3.11 (0.5-19.54)  | 0.226     |
|                        | GG                      | 4/0          | 1                | 1.000     | 1.00                        |           | 1.00               |           | 1.00                     |           | 1.00             |           | 1.00              |           |
| Dominant               | AA                      | 74/34        | Reference        |           | Reference                   |           | Reference          |           | Reference                |           | Reference        |           | Reference         |           |
|                        | AG+GG                   | 54/12        | 2.07 (0.98–4.36) | 0.056     | 2.07 (0.59 - 7.3)           | 0.258     | 1.95 (0.76 - 4.98) | 0.162     | 3.3 (0.89-12.22)         | 0.074     | 1.34 (0.4-4.48)  | 0.630     | 3.5 (0.57-21.67)  | 0.178     |
|                        | Recessive               | AA+AG        | 124/46           | Reference |                             | Reference |                    | Reference |                          | Reference |                  | Reference |                   | Reference |
|                        | GG                      | 4/0          | 1                | 1.000     | 1                           | 1.000     | 1                  | 1.000     | 1.00                     |           | 1.00             |           | 1.00              |           |
| Allelic                | A                       | 198/80       | Reference        |           | Reference                   |           | Reference          |           | Reference                |           | Reference        |           | Reference         |           |
|                        | G                       | 58/12        | 1.95 (1.00–3.83) | 0.051     | 2 (0.62-6.42)               | 0.244     | 1.83 (0.8-4.21)    | 0.152     | 3.1 (0.89-10.76)         | 0.075     | 1.3 (0.49-3.49)  | 0.600     | 3.08 (0.6-15.88)  | 0.179     |
|                        | rs1544410<br>BsmI [VDR] |              |                  |           |                             |           |                    |           |                          |           |                  |           |                   |           |
| Additive               | TT                      | 4/0          | Reference        |           | Reference                   |           | Reference          |           | Reference                |           | Reference        |           | Reference         |           |
|                        | TC                      | 57/13        | 2.13 (1.02–4.42) | 0.043     | 1.44 (0.44 - 4.79)          | 0.544     | 2.48 (0.97 - 6.34) | 0.058     | 3.66 (0.99-13.56)        | 0.052     | 1.03 (0.31-3.43) | 0.962     | 6.42 (1.00-41.21) | 0.05      |
|                        | CC                      | 68/33        | 1                | 1.000     | 1.00                        |           | 1.00               |           | 1.00                     |           | 1.00             |           | 1.00              |           |
| Dominant               | TT                      | 4/0          | Reference        |           | Reference                   |           | Reference          |           | Reference                |           | Reference        |           | Reference         |           |
|                        | TC+CC                   | 125/46       | 1                | 1.000     | 1.00                        |           | 1.00               |           | 1.00                     |           | 1.00             |           | 1.00              |           |
|                        | Recessive               | TT+TC        | 61/13            | Reference |                             | Reference |                    | Reference |                          | Reference |                  | Reference |                   | Reference |
|                        | CC                      | 68/33        | 0.44 (0.21–0.91) | 0.027     | 0.64 (0.2 -2.12)            | 0.469     | 0.38 (0.15 - 0.96) | 0.041     | 0.25 (0.07-0.94)         | 0.040     | 0.93 (0.28-3.07) | 0.899     | 0.14 (0.02-0.91)  | 0.039     |
| Allelic                | T                       | 65/13        | Reference        |           | Reference                   |           | Reference          |           | Reference                |           | Reference        |           | Reference         |           |
|                        | C                       | 193/79       | 0.49 (0.25–0.94) | 0.031     | 0.64 (0.22-1.9)             | 0.424     | 0.45 (0.2-1.02)    | 0.057     | 0.28 (0.08-0.98)         | 0.046     | 0.89 (0.35-2.31) | 0.814     | 0.22 (0.04-1.12)  | 0.068     |
|                        | rs2228570<br>FokI [VDR] |              |                  |           |                             |           |                    |           |                          |           |                  |           |                   |           |
| Additive               | AA                      | 14/4         | Reference        |           | Reference                   |           | Reference          |           | Reference                |           | Reference        |           | Reference         |           |
|                        | AG                      | 61/17        | 1.02 (0.3–3.52)  | 0.968     | 1.75 (0.32 -9 .47)          | 0.516     | 0.5 (0.06 - 4.47)  | 0.535     | 0.49 (0.05-4.43)         | 0.522     | 0.63 (0.06-6.8)  | 0.700     | 1.5 (0.25-8.98)   | 0.657     |

|                                |       |        |                  |        |                     |       |                    |       |                  |        |                  |       |                   |       |
|--------------------------------|-------|--------|------------------|--------|---------------------|-------|--------------------|-------|------------------|--------|------------------|-------|-------------------|-------|
|                                | GG    | 56/25  | 0.64 (0.19–2.14) | 0.469  | 1.97 (0.36 - 10.82) | 0.436 | 0.21 (0.02 - 1.74) | 0.147 | 0.21 (0.02-1.78) | 0.152  | 0.66 (0.06-6.8)  | 0.724 | 1.00              |       |
| <b>Dominant</b>                | AA    | 14/4   | Reference        |        | Reference           |       | Reference          |       | Reference        |        | Reference        |       | Reference         |       |
|                                | AG+GG | 117/42 | 0.8 (0.25–2.55)  | 0.701  | 1.85 (0.37 - 9.17)  | 0.76  | 0.3 (0.04 - 2.46)  | 0.262 | 0.3 (0.04-2.48)  | 0.264  | 0.64 (0.07-6.26) | 0.704 | 1.00              |       |
| <b>Recessive</b>               | AA+AG | 75/21  | Reference        |        | Reference           |       | Reference          |       | Reference        |        | Reference        |       | Reference         |       |
|                                | GG    | 56/25  | 0.63 (0.32–1.23) | 0.176  | 1.26 (0.43 - 3.66)  | 0.671 | 0.37 (0.15 - 0.93) | 0.034 | 0.38 (0.14-1.01) | 0.053  | 0.97 (0.29-3.18) | 0.956 | 1 (0.18-5.46)     | 1.00  |
| <b>Allelic</b>                 | A     | 89/25  | Reference        |        | Reference           |       | Reference          |       | Reference        |        | Reference        |       | Reference         |       |
|                                | G     | 173/67 | 0.73 (0.43–1.23) | 0.231  | 1.3 (0.6-2.83)      | 0.504 | 0.44 (0.2-0.93)    | 0.032 | 0.44 (0.2-0.98)  | 0.045  | 0.9 (0.35-2.31)  | 0.829 | 1.6 (0.5-5.1)     | 0.427 |
| <b>rs6013897<br/>[CYP24A1]</b> |       |        |                  |        |                     |       |                    |       |                  |        |                  |       |                   |       |
| <b>Additive</b>                | AA    | 3/1    | Reference        |        | Reference           |       | Reference          |       | Reference        |        | Reference        |       | Reference         |       |
|                                | AT    | 34/13  | 0.87 (0.08–9.15) | 0.909  | 0.73 (0.23-2.37)    | 0.604 | 1.64 (0.13-20.94)  | 0.702 | 0.79 (0.29-2.14) | 0.638  | 0.4 (0.09-1.78)  | 0.231 | 4.45 (0.45-44.4)  | 0.203 |
|                                | TT    | 94/32  | 0.98 (0.1–9.75)  | 0.986  | 1.00                |       | 1.64 (0.14-19.14)  | 0.694 | 1.00             |        | 1.00             |       | 1.00              |       |
| <b>Dominant</b>                | AA    | 3/1    | Reference        |        | Reference           |       | Reference          |       | Reference        |        | Reference        |       | Reference         |       |
|                                | AT+TT | 128/45 | 0.95 (0.1–9.35)  | 0.964  | 1.00                |       | 1.64 (0.14-18.85)  | 0.691 | 1.00             |        | 1.00             |       | 1.00              |       |
| <b>Recessive</b>               | AA+AT | 37/14  | Reference        |        | Reference           |       | Reference          |       | Reference        |        | Reference        |       | Reference         |       |
|                                | TT    | 94/32  | 1.11(0.53–2.32)  | 0.778  | 1.25 (0.39-3.99)    | 0.706 | 1.05 (0.4-2.73)    | 0.922 | 1.17 (0.43-3.16) | 0.762  | 2.06 (0.49-8.66) | 0.324 | 0.45 (0.07-2.81)  | 0.392 |
| <b>Allelic</b>                 | A     | 40/15  | Reference        |        | Reference           |       | Reference          |       | Reference        |        | Reference        |       | Reference         |       |
|                                | T     | 222/77 | 1.08 (0.57–2.07) | 0.813  | 1.1 (0.39-3.13)     | 0.859 | 1.09 (0.48-2.5)    | 0.833 | 1.03 (0.43-2.46) | 0.06   | 1.6 (0.43-5.93)  | 0.479 | 0.83 (0.19-3.67)  | 0.805 |
| <b>rs6127099<br/>[CYP24A1]</b> |       |        |                  |        |                     |       |                    |       |                  |        |                  |       |                   |       |
| <b>Additive</b>                | AA    | 68/13  | Reference        |        | Reference           |       | Reference          |       | Reference        |        | Reference        |       | Reference         |       |
|                                | AT    | 49/25  | 0.37 (0.17–0.8)  | 0.012  | 0.24 (0.07 - 0.8)   | 0.02  | 0.46 (0.17-1.27)   | 0.135 | 0.17 (0.05-0.57) | 0.004* | 0.42 (0.1-1.72)  | 0.229 | 1.88 (0.34-10.46) | 0.474 |
|                                | TT    | 8/7    | 0.22 (0.07–0.71) | 0.011  | 0.07 (0.01-0.78)    | 0.031 | 0.31 (0.072-1.36)  | 0.122 | 0.24 (0.04-1.69) | 0.153  | 0.11 (0.01-0.79) | 0.028 | 0.63 (0.03-12.4)  | 0.758 |
| <b>Dominant</b>                | AA    | 68/13  | Reference        |        | Reference           |       | Reference          |       | Reference        |        | Reference        |       | Reference         |       |
|                                | AT+TT | 57/32  | 0.34 (0.16–0.71) | 0.004* | 0.21 (0.07-0.65)    | 0.007 | 0.43(0.16-1.14)    | 0.089 | 0.18 (0.05-0.58) | 0.004* | 0.31 (0.08-1.15) | 0.08  | 1.56 (0.31-1.82)  | 0.587 |
| <b>Recessive</b>               | AA+AT | 117/38 | Reference        |        | Reference           |       | Reference          |       | Reference        |        | Reference        |       | Reference         |       |
|                                | TT    | 8/7    | 0.37 (0.13–1.09) | 0.072  | 0.13 (0.01-1.39)    | 0.092 | 0.49 (0.13-1.83)   | 0.290 | 0.71 (0.13-3.95) | 0.695  | 0.17 (0.03-1.04) | 0.055 | 0.47 (0.03-8.52)  | 0.610 |





|                  |       |        |                   |       |                  |       |                   |       |                  |       |                   |       |           |
|------------------|-------|--------|-------------------|-------|------------------|-------|-------------------|-------|------------------|-------|-------------------|-------|-----------|
|                  | AG    | 30/9   | 3.33 (0.41–27.13) | 0.260 | 1.55 (0.43-5.58) | 0.504 | 7.2 (0.54-96.6)   | 0.136 | -                |       | 2 (0.2-19.9)      | 0.554 | 1.00      |
|                  | GG    | 95/35  | 2.71 (0.37–20.01) | 0.327 | 1.00             |       | 6.74(0.58-78.42)  | 0.128 | 0.95 (0.31-2.96) | 0.932 | 3.11 (0.38-25.38) | 0.289 | 1.00      |
| <b>Dominant</b>  | AA    | 2/2    | Reference         |       | Reference        |       | Reference         |       | Reference        |       | Reference         |       | Reference |
|                  | AG+GG | 125/44 | 2.84 (0.39–20.78) | 0.304 | 1.00             |       | 6.83 (0.59-78.65) | 0.123 | 1.00             |       | 2.77 (0.35-21.73) | 0.332 | 1.00      |
| <b>Recessive</b> | AA+AG | 32/11  | Reference         |       | Reference        |       | Reference         |       | Reference        |       | Reference         |       | Reference |
|                  | GG    | 95/35  | 0.93 (0.42–2.05)  | 0.863 | 0.6 (0.17-2.13)  | 0.426 | 1.24(0.45-3.4)    | 0.674 | 0.95 (0.31-2.96) | 0.932 | 1.87 (0.53-6.58)  | 0.332 | 1.00      |
| <b>Allelic</b>   | A     | 34/13  | Reference         |       | Reference        |       | Reference         |       | Reference        |       | Reference         |       | Reference |
|                  | G     | 220/79 | 1.06 (0.53–2.12)  | 0.858 | 0.59 (0.18-1.91) | 0.377 | 1.53 (0.65-3.6)   | 0.332 | 0.96 (0.33-2.76) | 0.936 | 1.94 (0.7-5.36)   | 0.202 | 1.00      |
